# Supplementary material for: Usual Dietary Intake, Nutritional Adequacy and Food Sources of Calcium, Phosphorus, Magnesium and Vitamin D of Spanish Children Aged One to <10 Years. Findings from the EsNuPI Study
Source: PubMed Central journal article supplement (PMC7353376; doi:10.3390/nu12061787), 2020-06-16
Supplement: nutrients-12-01787-s001.pdf [file nutrients-12-01787-s001.pdf]

**Table S1.** Daily calcium, phosphorus, magnesium, and vitamin D usual intakes by sex and age group in the EsNuPI Study population. Results of plausible reporters.

| Group by age               | AR  | AI  | Boys     |      |                      |         |         | Girls  |      |                     |         |         |
|----------------------------|-----|-----|----------|------|----------------------|---------|---------|--------|------|---------------------|---------|---------|
|                            |     |     | Mean     | SD   | Median (P5–P95)      | <AR (%) | >AI (%) | Mean   | SD   | Median (P5–P95)     | <AR (%) | >AI (%) |
| Calcium (mg/day), RS #     |     |     |          |      |                      |         |         |        |      |                     |         |         |
| 1-<4 years                 | 390 |     | 713a     | 166  | 706 (454–999)a       | 1.6     |         | 720a   | 154  | 713 (479–984)a      | 0.5     |         |
| 4-<6 years                 | 680 |     | 789b     | 43   | 788 (720–861)b       | 20.0    |         | 716a   | 136  | 705 (511–956)b      | 37.0    |         |
| 6-<10 years                | 680 |     | 834c*    | 195  | 826 (527–1169)c*     | 24.9    |         | 808b   | 136  | 801 (596–1044)c     | 22.0    |         |
| Calcium (mg/day), AMS #    |     |     |          |      |                      |         |         |        |      |                     |         |         |
| 1-<4 years                 | 390 |     | 695a     | 114  | 691 (513–889)a       | 0.5     |         | 717a   | 124  | 712 (523–930)a      | 0.4     |         |
| 4-<6 years                 | 680 |     | 845b     | 126  | 838 (648–1062)a      | 14.9    |         | 757b   | 108  | 756 (580–937)a      | 21.5    |         |
| 6-<10 years                | 680 |     | 930c*    | 118  | 926 (744–1130)b*     | 3.7     |         | 849c   | 183  | 835 (574–1172)b     | 18.6    |         |
| Phosphorus (mg/day), RS #  |     |     |          |      |                      |         |         |        |      |                     |         |         |
| 1-<4 years                 |     | 250 | 911a*    | 184  | 910 (608–1214)a*     |         | 100     | 915a   | 195  | 921 (587–1228)a     |         | 100     |
| 4-<6 years                 |     | 440 | 1131b*   | 124  | 1128 (932–1341)b*    |         | 100     | 1056b* | 154  | 1048 (817–1322)b*   |         | 100     |
| 6-<10 years                |     | 440 | 1210c    | 211  | 1199 (882–1573)c     |         | 100     | 1152c  | 109  | 1149 (978–1336)c    |         | 100     |
| Phosphorus (mg/day), AMS # |     |     |          |      |                      |         |         |        |      |                     |         |         |
| 1-<4 years                 |     | 250 | 808a*    | 153  | 805 (560–1063)a*     |         | 100     | 849a   | 191  | 842 (545–1173)a     |         | 100     |
| 4-<6 years                 |     | 440 | 1109b*   | 153  | 1104 (868–1369)b*    |         | 100     | 1003b* | 117  | 1000 (815–1200)b*   |         | 100     |
| 6-<10 years                |     | 440 | 1220c    | 155  | 1213 (977–1487)c     |         | 100     | 1140c  | 168  | 1134 (874–1426)c    |         | 100     |
| Magnesium (mg/day), RS #   |     |     |          |      |                      |         |         |        |      |                     |         |         |
| 1-<3 years                 |     | 170 | 165a     | 52   | 162 (85–254)a        |         | 44.2    | 173a   | 41   | 170 (111–244)a      |         | 50.3    |
| 3-<6 years                 |     | 230 | 209b*    | 15   | 208 (186–235)b*      |         | 8.3     | 195b   | 31   | 192 (149–249)b*     |         | 12.6    |
| 6-<10 years                |     | 230 | 226c*    | 36   | 224 (171–288)c*      |         | 43.2    | 212c   | 26   | 210 (171–257)c*     |         | 23.3    |
| Magnesium (mg/day), AMS #  |     |     |          |      |                      |         |         |        |      |                     |         |         |
| 1-<3 years                 |     | 170 | 176a     | 39   | 172 (120–246)a       |         | 51.7    | 169a   | 49   | 164 (101–255)a      |         | 43.5    |
| 3-<6 years                 |     | 230 | 185b*    | 18   | 185 (156–217)b*      |         | 1.1     | 172*a  | 21   | 171 (138–208)a*     |         | 0.5     |
| 6-<10 years                |     | 230 | 196c*    | 16   | 195 (170–223)c*      |         | 1.9     | 187*b  | 37   | 186 (129–251)b*     |         | 12.9    |
| Vitamin D (µg/day), RS #   |     |     |          |      |                      |         |         |        |      |                     |         |         |
| 1-<4 years                 |     | 15  | 2.65a*   | 2.46 | 2.62 (0.50–8.75)a.b* |         | 0.6     | 2.50*  | 2.08 | 2.19 (0.41–8.03)*   |         | 0.5     |
| 4-<6 years                 |     | 15  | 2.48b*   | 1.91 | 2.12 (0.54–6.40)a*   |         | 0.0     | 3.09*  | 2.01 | 2.90 (0.94–7.47)*   |         | 0.1     |
| 6-<10 years                |     | 15  | 2.97a,b* | 1.09 | 2.88 (1.66–4.69)b*   |         | 0.0     | 3.02*  | 1.68 | 2.72 (0.92–6.68)*   |         | 0.0     |
| Vitamin D (µg/day), AMS #  |     |     |          |      |                      |         |         |        |      |                     |         |         |
| 1-<4 years                 |     | 15  | 6.79*    | 2.33 | 6.53 (3.35–10.76)*   |         | 0.1     | 7.61a* | 2.54 | 7.25 (4.55–11.01)a* |         | 0.3     |
| 4-<6 years                 |     | 15  | 8.04*    | 3.34 | 8.41 (3.66–15.63)*   |         | 6.4     | 6.74b* | 2.63 | 6.75 (3.37–11.69)b* |         | 0.7     |
| 6-<10 years                |     | 15  | 7.35*    | 2.96 | 7.33 (3.10–13.71)*   |         | 2.7     | 6.51b* | 2.61 | 6.19 (2.88–10.77)b* |         | 0.2     |

Average Requirement (AR) and Adequate intake (AI) (EFSA, 2017). RS: Reference Sample. AMS: Adapted milk consumers sample. #: Variable that does not follow a normal distribution. Results of plausible reporters (n = 1216) expressed as the mean, standard deviation, median, and P5–P95 (in brackets). Differences between the RS and AMS samples (in the total sample and by sex) are indicated with asterisks, applying the Chi-square and Mann–Whitney tests. The letters indicate differences between age groups for each sex and in each sample type (RS and AMS), applying the Kruskal–Wallis or ANOVA tests. Different letters indicate significant differences. P-value < 0.05 was considered statistically significant.

Table S2.- Percentage of the 18 food groups sources, in terms of the total **calcium** intake (in %), among Spanish Pediatric Population (EsNuPI) study by age group, in both the reference and the adapted milk consumer samples (n = 1448).

| Groups                                  | Reference sample |            |             | Adapted milk consumers |            |             |
|-----------------------------------------|------------------|------------|-------------|------------------------|------------|-------------|
|                                         | 1-<3 years       | 3-<6 years | 6-<10 years | 1-<3 years             | 3-<6 years | 6-<10 years |
| Cereals                                 | 3.6              | 5.7        | 7.4         | 2.7                    | 5.8        | 6.3         |
| Milk and dairy products                 | 69.9             | 64.9       | 64.7        | 70.7                   | 66.6       | 64.2        |
| Eggs                                    | 1.3              | 1.7        | 1.9         | 1.6                    | 1.8        | 1.8         |
| Sugars and sweets                       | 0.4              | 1.0        | 1.0         | 0.4                    | 1.0        | 1.2         |
| Oils and fats                           | 0.0              | 0.0        | 0.0         | 0.0                    | 0.0        | 0.0         |
| Vegetables                              | 4.7              | 3.8        | 3.3         | 5.0                    | 3.3        | 2.6         |
| Legumes                                 | 1.4              | 1.8        | 1.6         | 1.1                    | 1.3        | 1.2         |
| Fruits                                  | 2.8              | 2.3        | 2.3         | 3.2                    | 2.5        | 2.3         |
| Nuts                                    | 0.0              | 0.1        | 0.2         | 0.0                    | 0.1        | 0.1         |
| Meat and meat products                  | 1.0              | 1.5        | 1.6         | 1.0                    | 1.4        | 1.3         |
| Fish and shellfish                      | 1.1              | 1.3        | 1.5         | 1.1                    | 1.1        | 1.3         |
| Beverages                               | 0.6              | 0.9        | 1.0         | 0.5                    | 0.9        | 0.8         |
| Sauces and condiments                   | 0.2              | 0.5        | 0.5         | 0.2                    | 0.5        | 0.4         |
| Ready to cook                           | 1.3              | 3.1        | 2.4         | 0.6                    | 2.2        | 4.8         |
| Appetizers                              | 0.3              | 0.3        | 0.2         | 0.3                    | 0.3        | 0.5         |
| Cereal-based baby foods and supplements | 2.8              | 0.3        | 0.0         | 3.3                    | 0.4        | 0.1         |
| Bakery and pastry                       | 2.7              | 3.7        | 3.9         | 2.6                    | 3.2        | 3.3         |
| Other dairy products                    | 5.9              | 7.1        | 6.5         | 5.6                    | 7.4        | 7.9         |

Table S3.- Percentage of the 18 food groups sources, in terms of the total **phosphorus** intake (in %), among Spanish Pediatric Population (EsNuPI) study by age group, in both the reference and the adapted milk consumer samples (n = 1448).

| Groups                                  | Reference sample |            |             | Adapted milk consumers |            |             |
|-----------------------------------------|------------------|------------|-------------|------------------------|------------|-------------|
|                                         | 1-<3 years       | 3-<6 years | 6-<10 years | 1-<3 years             | 3-<6 years | 6-<10 years |
| Cereals                                 | 5.9              | 9.0        | 10.2        | 5.6                    | 9.1        | 9.7         |
| Milk and dairy products                 | 47.6             | 39.2       | 37.3        | 47.1                   | 40.4       | 39.0        |
| Eggs                                    | 3.7              | 4.2        | 4.6         | 4.8                    | 4.9        | 4.8         |
| Sugars and sweets                       | 2.4              | 4.3        | 5.1         | 2.2                    | 4.5        | 5.4         |
| Oils and fats                           | 0.0              | 0.0        | 0.0         | 0.0                    | 0.0        | 0.0         |
| Vegetables                              | 5.3              | 3.9        | 3.7         | 5.9                    | 3.6        | 2.8         |
| Legumes                                 | 3.4              | 3.6        | 3.3         | 2.8                    | 3.0        | 2.6         |
| Fruits                                  | 3.5              | 2.6        | 2.2         | 4.2                    | 2.9        | 2.2         |
| Nuts                                    | 0.0              | 0.3        | 0.5         | 0.0                    | 0.1        | 0.1         |
| Meat and meat products                  | 10.4             | 13.3       | 13.1        | 10.9                   | 12.5       | 11.6        |
| Fish and shellfish                      | 6.2              | 5.9        | 6.3         | 6.7                    | 5.6        | 5.9         |
| Beverages                               | 1.1              | 1.1        | 1.4         | 0.7                    | 1.1        | 1.1         |
| Sauces and condiments                   | 0.2              | 0.3        | 0.3         | 0.1                    | 0.3        | 0.2         |
| Ready to cook                           | 2.4              | 3.1        | 3.0         | 1.2                    | 2.9        | 4.6         |
| Appetizers                              | 0.5              | 0.4        | 0.5         | 0.3                    | 0.6        | 0.5         |
| Cereal-based baby foods and supplements | 0.0              | 0.0        | 0.0         | 0.0                    | 0.0        | 0.0         |
| Bakery and pastry                       | 3.7              | 4.5        | 4.5         | 3.7                    | 4.1        | 4.2         |
| Other dairy products                    | 3.8              | 4.0        | 3.7         | 3.6                    | 4.4        | 5.0         |

Table S4. Percentage of the 18 food groups sources, in terms of the total **magnesium** intake (in %), among Spanish Pediatric Population (EsNuPI) study by age group, in both the reference and the adapted milk consumer samples (n = 1448).

| Groups                                  | Reference sample |            |             | Adapted milk consumers |            |             |
|-----------------------------------------|------------------|------------|-------------|------------------------|------------|-------------|
|                                         | 1-<3 years       | 3-<6 years | 6-<10 years | 1-<3 years             | 3-<6 years | 6-<10 years |
| Cereals                                 | 9.7              | 14.9       | 17.4        | 8.1                    | 16.1       | 19.3        |
| Milk and dairy products                 | 29.3             | 23.2       | 21.6        | 33.6                   | 19.8       | 14.2        |
| Eggs                                    | 1.2              | 1.3        | 1.5         | 1.4                    | 1.7        | 1.9         |
| Sugars and sweets                       | 0.8              | 1.6        | 1.8         | 0.7                    | 1.7        | 2.6         |
| Oils and fats                           | 0.0              | 0.0        | 0.0         | 0.0                    | 0.0        | 0.0         |
| Vegetables                              | 11.9             | 8.8        | 8.7         | 12.5                   | 8.4        | 7.6         |
| Legumes                                 | 6.8              | 7.7        | 7.1         | 5.1                    | 6.6        | 6.6         |
| Fruits                                  | 16.4             | 12.9       | 10.6        | 17.2                   | 14.9       | 12.4        |
| Nuts                                    | 0.0              | 0.7        | 1.4         | 0.1                    | 0.3        | 0.4         |
| Meat and meat products                  | 6.9              | 8.7        | 8.7         | 6.9                    | 8.9        | 8.9         |
| Fish and shellfish                      | 3.9              | 3.9        | 4.4         | 4.0                    | 4.0        | 4.8         |
| Beverages                               | 2.6              | 3.3        | 3.5         | 2.3                    | 3.5        | 3.4         |
| Sauces and condiments                   | 0.7              | 1.4        | 1.3         | 0.7                    | 1.5        | 1.4         |
| Ready to cook                           | 2.1              | 2.8        | 2.8         | 1.0                    | 2.7        | 4.5         |
| Appetizers                              | 1.4              | 1.2        | 1.6         | 0.6                    | 1.7        | 1.7         |
| Cereal-based baby foods and supplements | 0.0              | 0.0        | 0.0         | 0.0                    | 0.0        | 0.1         |
| Bakery and pastry                       | 3.5              | 4.3        | 4.5         | 3.2                    | 4.3        | 5.1         |
| Other dairy products                    | 2.9              | 3.3        | 3.1         | 2.5                    | 3.8        | 5.2         |

Table S5. Percentage of the 18 food groups sources, in terms of the total **Vitamin D** intake (in %), among Spanish Pediatric Population (EsNuPI) study by age group, in both the reference and the adapted milk consumer samples (n = 1448).

| Groups                                  | Reference sample |            |             | Adapted milk consumers |            |             |
|-----------------------------------------|------------------|------------|-------------|------------------------|------------|-------------|
|                                         | 1-<3 years       | 3-<6 years | 6-<10 years | 1-<3 years             | 3-<6 years | 6-<10 years |
| Cereals                                 | 5.2              | 10.0       | 12.1        | 1.7                    | 5.0        | 4.5         |
| Milk and dairy products                 | 43.5             | 41.0       | 29.6        | 74.4                   | 71.4       | 72.2        |
| Eggs                                    | 8.1              | 14.6       | 15.1        | 4.8                    | 7.0        | 7.0         |
| Sugars and sweets                       | 0.0              | 0.0        | 0.0         | 0.0                    | 0.0        | 0.0         |
| Oils and fats                           | 0.1              | 0.3        | 0.2         | 0.1                    | 0.1        | 0.1         |
| Vegetables                              | 0.0              | 0.0        | 0.0         | 0.0                    | 0.0        | 0.0         |
| Legumes                                 | 0.0              | 0.0        | 0.0         | 0.0                    | 0.0        | 0.0         |
| Fruits                                  | 0.0              | 0.0        | 0.0         | 0.0                    | 0.0        | 0.0         |
| Nuts                                    | 0.0              | 0.0        | 0.0         | 0.0                    | 0.0        | 0.0         |
| Meat and meat products                  | 0.1              | 0.2        | 0.2         | 0.0                    | 0.1        | 0.1         |
| Fish and shellfish                      | 16.2             | 21.5       | 33.1        | 4.4                    | 11.0       | 11.4        |
| Beverages                               | 0.0              | 0.1        | 0.0         | 0.0                    | 0.1        | 0.0         |
| Sauces and condiments                   | 0.1              | 0.2        | 0.2         | 0.0                    | 0.1        | 0.1         |
| Ready to cook                           | 0.8              | 1.8        | 2.3         | 0.3                    | 0.4        | 1.2         |
| Appetizers                              | 0.0              | 0.0        | 0.0         | 0.0                    | 0.0        | 0.0         |
| Cereal-based baby foods and supplements | 22.7             | 3.4        | 0.2         | 12.9                   | 2.0        | 0.2         |
| Bakery and pastry                       | 1.9              | 4.4        | 4.6         | 0.8                    | 1.8        | 1.9         |
| Other dairy products                    | 1.3              | 2.4        | 2.3         | 0.5                    | 1.0        | 1.3         |
